# Supplementary material for: A novel label-free strategy for pathogenic DNA detection based on metal ion binding-induced fluorescence quenching of graphitic carbon nitride nanosheets
Source: Royal Society of Chemistry journal article supplement (doi:10.1039/c7an00553a), 2017-01-01
Supplement: c7an00553a1.pdf [file c7an00553a1.pdf]

## Supporting Information

### **A novel label-free strategy for pathogenic DNA detection based on metal ions binding-induced fluorescence quenching of graphitic carbon nitride nanosheets**

Yan Xiao, Yuhao, Sheng, Jie Zhou, Miaomiao Chen, Wei Wen, Xiuhua Zhang\*, Shengfu Wang

*Hubei Collaborative Innovation Center for Advanced Organic Chemical Materials, Ministry of Education Key Laboratory for the Synthesis and Application of Organic Functional Molecules & College of Chemistry and Chemical Engineering, Hubei University, Wuhan 430062, PR China*

**\*Corresponding Authors:**

*E-mail: zhangxh@hubu.edu.cn*

*Tel.: +86-27-50865309. Fax: +86-27-88663043*

## Supplementary Tables and Figures

**Table S1.** Sequences of the oligonucleotides used in the experiments.

| Names                                    |         | Sequence (5'-3')                               |
|------------------------------------------|---------|------------------------------------------------|
| Probe for HBV gene                       | Probe 1 | CCCCCCTACCACATCATCCATATAACTGAA<br>AGCCAACCCCCC |
|                                          | Probe 2 | CCCCCCTACCACATCATCCATATAACTGAA<br>ACCCCCC      |
|                                          | Probe 3 | CCCCCCTACCACATCATCCATATAACCCCC<br>CC           |
|                                          | Probe 4 | TTTTTTTACCACATCATCCATATAACTGAA<br>AGCCAATTTTTT |
| HBV gene                                 |         | TTGGCTTTCAGTTATATGGATGATGTGGTA                 |
| The single-base mismatched (SBM) strand* |         | TTGGCTTTCAGTTATAT <u>T</u> GATGATGTGGTA        |
| The non-complementary (NC) strand        |         | ACTAAGGACTACAAGTACATTTTCGAATTCT                |

\*The mismatched base is underlined.

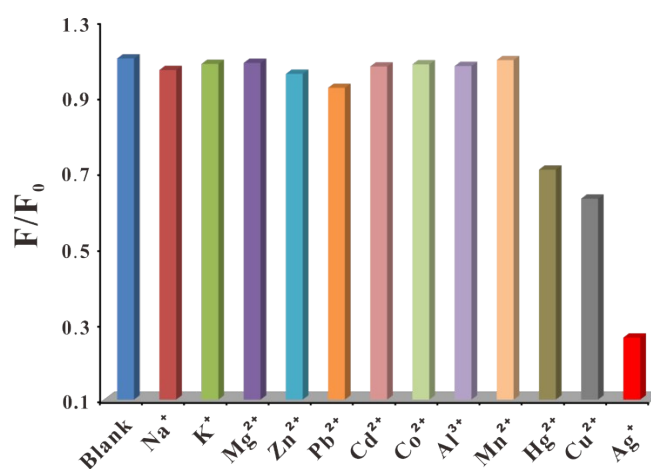

**Fig. S1.** Relative fluorescence intensity ( $F/F_0$ , where  $F$  and  $F_0$  represent the emission intensity of g-C<sub>3</sub>N<sub>4</sub> nanosheets in the presence and in the absence of the tested species, respectively) of the g-C<sub>3</sub>N<sub>4</sub> nanosheets in the presence of different metal ions. The concentrations of all tested species were 5  $\mu$ M.

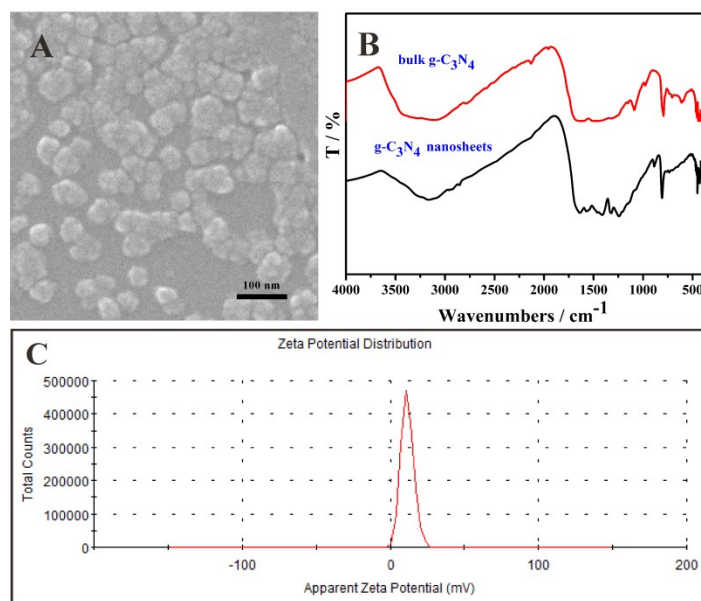

**Fig. S2.** (A) SEM image of g-C<sub>3</sub>N<sub>4</sub> nanosheets. (B) FT-IR spectra of bulk g-C<sub>3</sub>N<sub>4</sub> (red line) and g-C<sub>3</sub>N<sub>4</sub> nanosheets (black line). (C) Zeta potential of the prepared g-C<sub>3</sub>N<sub>4</sub> nanosheets.

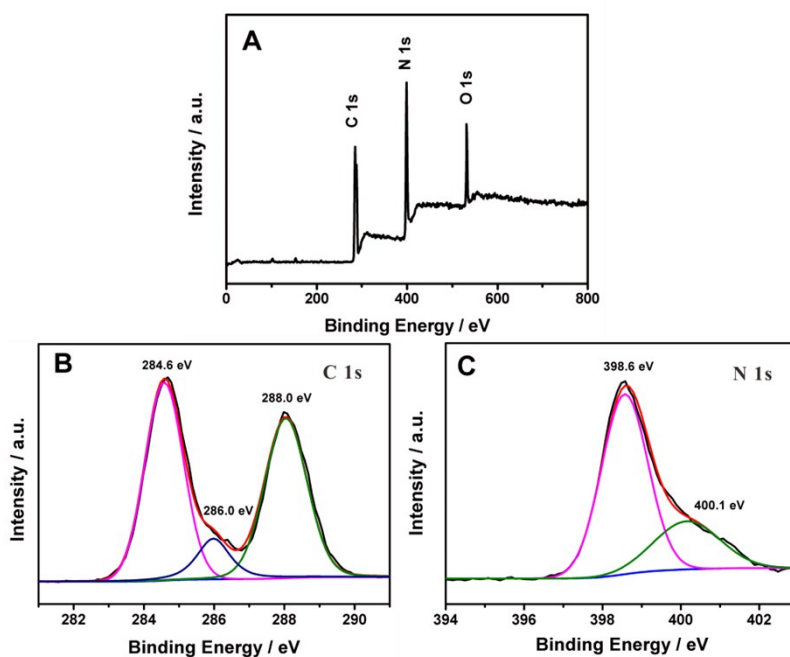

**Fig. S3.** (A) X-ray photoelectron spectroscopy (XPS) survey spectrum of g-C<sub>3</sub>N<sub>4</sub> nanosheets. (B, C) Expanded spectrum in the C 1s (b) and N 1s (c) region.

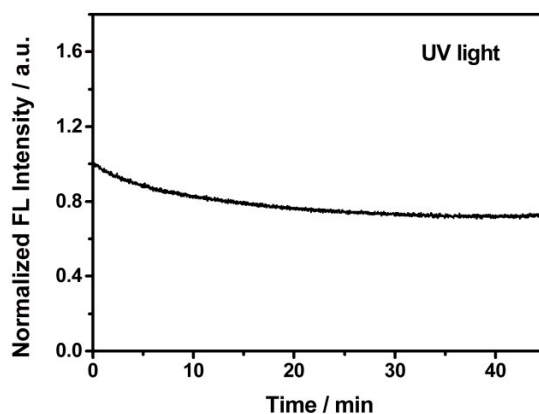

**Fig. S4.** Photostability of g-C<sub>3</sub>N<sub>4</sub> nanosheets under continuous illumination by UV light.

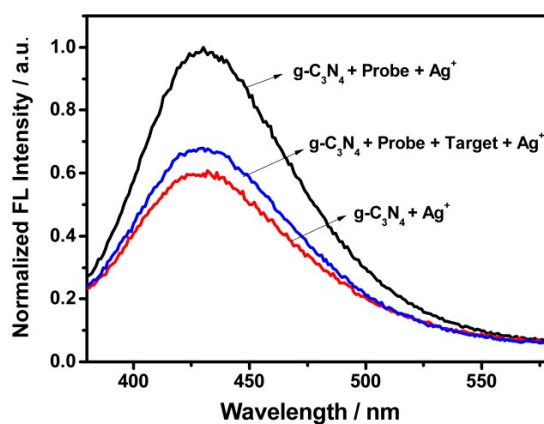

**Fig. S5.** Fluorescence spectra of g-C<sub>3</sub>N<sub>4</sub> nanosheets in the presence of different substances (black line: probe and Ag<sup>+</sup>; blue line: probe, target and Ag<sup>+</sup>; red line: Ag<sup>+</sup>).

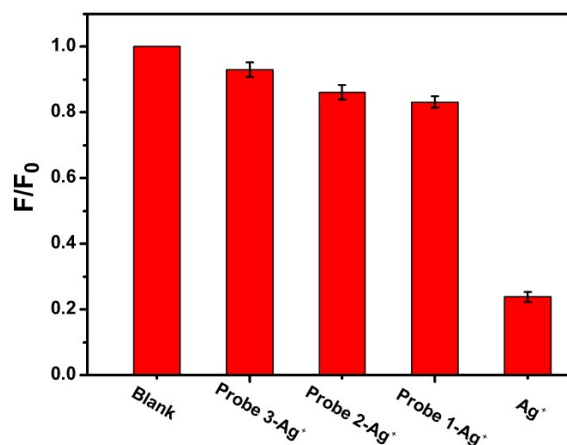

**Fig. S6.** Relative fluorescence intensity ( $F/F_0$ , where  $F$  and  $F_0$  represent the emission intensity of g-C<sub>3</sub>N<sub>4</sub> nanosheets in the presence and in the absence of the tested species, respectively) of the g-C<sub>3</sub>N<sub>4</sub> nanosheets after reaction with different C-Ag<sup>+</sup>-C probe DNAs and free Ag<sup>+</sup> in the absence of target. The Ag<sup>+</sup> concentrations of all tested species were 1  $\mu$ M.

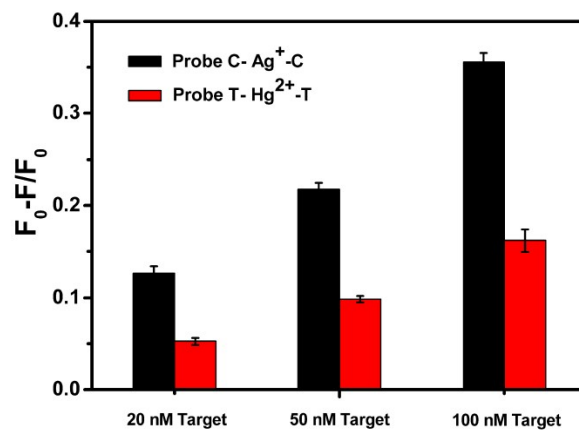

**Fig. S7.** Assay of the target DNAs using different probe system (black: Probe 1 C-Ag<sup>+</sup>-C, red: Probe 4 T-Hg<sup>2+</sup>-T).  $(F_0-F)/F_0$ , where F and  $F_0$  represent the emission intensity of g-C<sub>3</sub>N<sub>4</sub> nanosheets in the presence and in the absence of HBV gene, respectively.

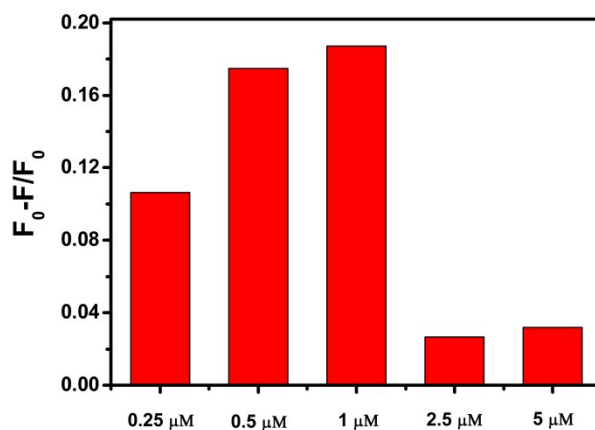

**Fig. S8.** Optimization of experimental conditions of the concentration of silver ions ( $(F_0-F)/F_0$ , where F and  $F_0$  represent the emission intensity of g-C<sub>3</sub>N<sub>4</sub> nanosheets in the presence and in the absence of HBV gene, respectively). The concentration of the probe was 0.1 μM.

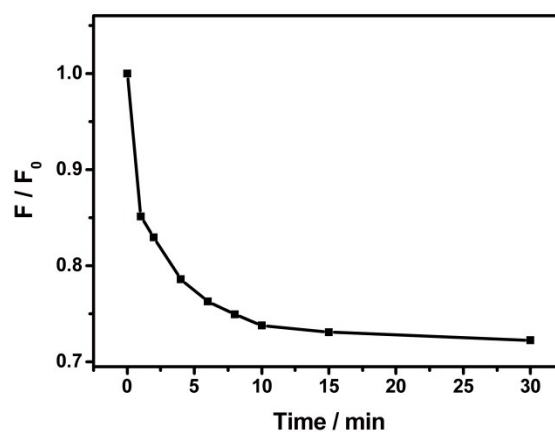

**Fig. S9.** Time dependence of the fluorescence quenching of 0.5 µg/mL g-C<sub>3</sub>N<sub>4</sub> nanosheets by 1 µM silver ions.

**Table S2.** Comparison of different fluorescence methods for DNA detection.

| Detection method | Strategy                                         | Linear range | Detection limit | ref       |
|------------------|--------------------------------------------------|--------------|-----------------|-----------|
| Fluorescence     | G-quadruplex/NMM                                 | 0-200 nM     | 5 nM            | 1         |
| Fluorescence     | QDs/BHQ                                          | 12-300 nM    | 4.03 nM         | 2         |
| Fluorescence     | FAM-DNA/CoOOH                                    | 1-50 nM      | 0.5 nM          | 3         |
| Fluorescence     | UCNPs/Au NPs                                     | 0-50 nM      | 0.25 nM         | 4         |
| Fluorescence     | DNA/Ag NCs                                       | 10-100 nM    | 3 nM            | 5         |
| Fluorescence     | Ag NCs/GO                                        | 10-100 nM    | 1.18 nM         | 6         |
| Fluorescence     | g-C <sub>3</sub> N <sub>4</sub> /Ag <sup>+</sup> | 2-100 nM     | 1.0 nM          | this work |

## References

- [1] J. T. Ren, J. H. Wang, J. Wang, N. W. Luedtke and E. K. Wang, *Biosens. Bioelectron.*, 2012, 31, 316-322.
- [2] J. Z. Lv, Y. M. Miao, J. J. Yang, J. Qin, D. X. Li and G. Q. Yan, *Biosens. Bioelectron.*, 2017, 91, 560-565.
- [3] A. H. Loo, Z. Sofer, D. Bouša, P. Ulbrich, A. Bonanni and M. Pumera, *ACS Appl. Mater. Interfaces.*, 2016, 8, 1951-1957.
- [4] H. Zhu, F. Lu, X. C. Wu and J. J. Zhu, *Analyst*, 2015, 140, 7622-7628.
- [5] Y. Xiao, Z. J. Wu, K. -Y. Wong and Z. H. Liu, *Chem. Commun.*, 2014, 50, 4849-4852.
- [6] S. Q. Zhang, K. Wang, K. -B. Lia, W. Shi, W. -P. Jia, X. Y. Chen, T. Sun and D. -M. Hana, *Biosens. Bioelectron.*, 2017, 91, 374-379.
